# Supplementary material for: Optimizing Microsatellite Marker Panels for Genetic Diversity and Population Genetic Studies: An Ant Colony Algorithm Approach with Polymorphic Information Content
Source: MDPI journal article supplement (doi:10.3390/biology12101280), 2023-09-25
Supplement: s1 [file s1]

**Table S1.** Summary of microsatellite markers used in this study.

| Dataset                                              | Locus   | Size range | $N_a$ <sup>1</sup> | $N_{ea}$ <sup>2</sup> | $AR$ <sup>3</sup> | $PIC$ <sup>4</sup> | $H_o$ <sup>5</sup> | $H_e$ <sup>6</sup> |
|------------------------------------------------------|---------|------------|--------------------|-----------------------|-------------------|--------------------|--------------------|--------------------|
| <i>Gallus gallus</i> 28 microsatellite markers       | MCW0248 | 208–224    | 10                 | 5.27                  | 0.02              | 0.77               | 0.63               | 0.81               |
|                                                      | MCW0111 | 80–120     | 31                 | 9.77                  | 0.05              | 0.88               | 0.65               | 0.90               |
|                                                      | ADL0268 | 106–135    | 17                 | 7.60                  | 0.03              | 0.85               | 0.65               | 0.87               |
|                                                      | LEI0234 | 212–376    | 72                 | 26.22                 | 0.12              | 0.95               | 0.76               | 0.96               |
|                                                      | MCW0206 | 207–248    | 27                 | 6.25                  | 0.04              | 0.81               | 0.66               | 0.84               |
|                                                      | MCW0034 | 201–249    | 27                 | 9.81                  | 0.04              | 0.88               | 0.62               | 0.90               |
|                                                      | MCW0222 | 214–230    | 13                 | 4.22                  | 0.02              | 0.69               | 0.30               | 0.76               |
|                                                      | MCW0103 | 259–270    | 9                  | 3.68                  | 0.01              | 0.64               | 0.50               | 0.73               |
|                                                      | MCW0016 | 126–177    | 34                 | 8.73                  | 0.05              | 0.87               | 0.81               | 0.89               |
|                                                      | LEI0166 | 245–365    | 21                 | 5.17                  | 0.03              | 0.74               | 0.57               | 0.81               |
|                                                      | MCW0037 | 147–160    | 9                  | 3.55                  | 0.01              | 0.65               | 0.54               | 0.72               |
|                                                      | MCW0295 | 82–111     | 18                 | 7.32                  | 0.03              | 0.84               | 0.67               | 0.86               |
|                                                      | LEI0094 | 231–283    | 41                 | 18.29                 | 0.07              | 0.93               | 0.68               | 0.95               |
|                                                      | MCW0098 | 215–267    | 10                 | 1.68                  | 0.02              | 0.31               | 0.28               | 0.41               |
|                                                      | MCW0078 | 133–154    | 15                 | 5.51                  | 0.02              | 0.77               | 0.53               | 0.82               |
|                                                      | MCW0081 | 102–157    | 26                 | 4.40                  | 0.04              | 0.73               | 0.61               | 0.77               |
|                                                      | LEI0192 | 251–490    | 82                 | 16.83                 | 0.13              | 0.93               | 0.68               | 0.94               |
|                                                      | MCW0014 | 160–217    | 25                 | 6.55                  | 0.04              | 0.79               | 0.40               | 0.85               |
|                                                      | MCW0183 | 286–361    | 38                 | 6.79                  | 0.06              | 0.83               | 0.58               | 0.85               |
|                                                      | ADL0278 | 109–151    | 25                 | 7.70                  | 0.04              | 0.84               | 0.64               | 0.87               |
|                                                      | MCW0067 | 170–184    | 10                 | 5.24                  | 0.02              | 0.75               | 0.67               | 0.81               |
|                                                      | ADL0112 | 112–144    | 17                 | 5.58                  | 0.03              | 0.77               | 0.57               | 0.82               |
|                                                      | MCW0216 | 129–187    | 30                 | 6.21                  | 0.05              | 0.80               | 0.54               | 0.84               |
|                                                      | MCW0104 | 186–254    | 46                 | 10.08                 | 0.08              | 0.88               | 0.66               | 0.90               |
|                                                      | MCW0123 | 76–114     | 21                 | 10.31                 | 0.03              | 0.88               | 0.80               | 0.90               |
|                                                      | MCW0330 | 247–291    | 25                 | 8.36                  | 0.04              | 0.85               | 0.60               | 0.88               |
|                                                      | MCW0165 | 106–129    | 16                 | 3.82                  | 0.03              | 0.69               | 0.61               | 0.74               |
|                                                      | MCW0069 | 152–186    | 20                 | 8.31                  | 0.03              | 0.86               | 0.70               | 0.88               |
| <i>Naemorhedus griseus</i> 11 microsatellite markers | SY434F  | 76–97      | 8                  | 1.64                  | 0.10              | 0.37               | 0.08               | 0.39               |
|                                                      | SY14F   | 86–125     | 11                 | 2.51                  | 0.14              | 0.57               | 0.22               | 0.60               |
|                                                      | SY259F  | 211–218    | 5                  | 1.14                  | 0.06              | 0.12               | 0.00               | 0.12               |
|                                                      | SY12BF  | 111–139    | 13                 | 5.28                  | 0.16              | 0.79               | 0.35               | 0.81               |
|                                                      | SY93F   | 104–168    | 13                 | 2.84                  | 0.16              | 0.62               | 0.38               | 0.65               |
|                                                      | SY129F  | 116–140    | 8                  | 1.50                  | 0.10              | 0.32               | 0.06               | 0.33               |
|                                                      | SY76F   | 129–159    | 5                  | 1.49                  | 0.06              | 0.31               | 0.05               | 0.33               |
|                                                      | SY449F  | 194–200    | 5                  | 1.48                  | 0.06              | 0.31               | 0.05               | 0.32               |
|                                                      | SY128F  | 134–168    | 11                 | 4.74                  | 0.14              | 0.77               | 0.58               | 0.79               |
|                                                      | SY84BF  | 162–202    | 10                 | 1.65                  | 0.13              | 0.38               | 0.19               | 0.39               |
|                                                      | SY84F   | 161–185    | 5                  | 2.06                  | 0.06              | 0.47               | 0.06               | 0.51               |

<sup>1</sup>  $N_a$ : Number of alleles, <sup>2</sup>  $N_{ea}$ : Number of effective alleles, <sup>3</sup>  $AR$ : Allele richness, <sup>4</sup>  $PIC$ : Polymorphic information content, <sup>5</sup>  $H_o$ : Observed heterozygosity, <sup>6</sup>  $H_e$ : Expected heterozygosity.

**Table S2.** Summary of microsatellite markers selected by the *PIC*+*ACO* selection scheme according to various margin errors. Data include number of alleles ( $N_a$ ), effective number of alleles ( $N_{ea}$ ), allele richness ( $AR$ ), polymorphic information content ( $PIC$ ), and observed ( $H_o$ ) and expected heterozygosity ( $H_e$ ).

| Dataset                                        | AGD Accuracy loss tolerance      | Locus   | $N_a$ | $N_{ea}$ | $AR$ | $PIC$ | $H_o$ | $H_e$ |
|------------------------------------------------|----------------------------------|---------|-------|----------|------|-------|-------|-------|
| <i>Gallus gallus</i> 28 microsatellite markers | GGA <sub>10</sub><br>(7 markers) | MCW0111 | 32    | 9.77     | 0.05 | 0.88  | 0.65  | 0.90  |
|                                                |                                  | LEI0234 | 73    | 26.22    | 0.12 | 0.95  | 0.76  | 0.96  |
|                                                |                                  | MCW0034 | 28    | 9.81     | 0.04 | 0.88  | 0.62  | 0.90  |
|                                                |                                  | MCW0016 | 35    | 8.73     | 0.05 | 0.87  | 0.81  | 0.89  |
|                                                |                                  | LEI0192 | 83    | 16.83    | 0.13 | 0.93  | 0.68  | 0.94  |
|                                                |                                  | MCW0183 | 39    | 6.79     | 0.06 | 0.83  | 0.58  | 0.85  |
|                                                |                                  | MCW0104 | 47    | 10.08    | 0.08 | 0.88  | 0.66  | 0.90  |
|                                                | GGA <sub>5</sub><br>(12 markers) | MCW0111 | 32    | 9.77     | 0.05 | 0.88  | 0.65  | 0.90  |
|                                                |                                  | LEI0234 | 73    | 26.22    | 0.12 | 0.95  | 0.76  | 0.96  |
|                                                |                                  | MCW0206 | 28    | 6.25     | 0.04 | 0.81  | 0.66  | 0.84  |
|                                                |                                  | MCW0034 | 28    | 9.81     | 0.04 | 0.88  | 0.62  | 0.90  |
|                                                |                                  | LEI0166 | 22    | 5.17     | 0.03 | 0.74  | 0.57  | 0.81  |
|                                                |                                  | LEI0094 | 42    | 18.29    | 0.07 | 0.93  | 0.68  | 0.95  |
|                                                |                                  | LEI0192 | 83    | 16.83    | 0.13 | 0.93  | 0.68  | 0.94  |
|                                                |                                  | MCW0183 | 39    | 6.79     | 0.06 | 0.83  | 0.58  | 0.85  |
|                                                |                                  | MCW0104 | 47    | 10.08    | 0.08 | 0.88  | 0.66  | 0.90  |
|                                                |                                  | MCW0123 | 22    | 10.31    | 0.03 | 0.88  | 0.80  | 0.90  |
|                                                |                                  | MCW0165 | 17    | 3.82     | 0.03 | 0.69  | 0.61  | 0.74  |
|                                                |                                  | MCW0069 | 21    | 8.31     | 0.03 | 0.86  | 0.70  | 0.88  |
|                                                | GGA <sub>1</sub><br>(26 markers) | MCW0248 | 11    | 5.27     | 0.02 | 0.77  | 0.63  | 0.81  |
|                                                |                                  | MCW0111 | 32    | 9.77     | 0.05 | 0.88  | 0.65  | 0.90  |
|                                                |                                  | ADL0268 | 18    | 7.60     | 0.03 | 0.85  | 0.65  | 0.87  |
|                                                |                                  | LEI0234 | 73    | 26.22    | 0.12 | 0.95  | 0.76  | 0.96  |
|                                                |                                  | MCW0206 | 28    | 6.25     | 0.04 | 0.81  | 0.66  | 0.84  |
|                                                |                                  | MCW0034 | 28    | 9.81     | 0.04 | 0.88  | 0.62  | 0.90  |
|                                                |                                  | MCW0222 | 14    | 4.22     | 0.02 | 0.69  | 0.30  | 0.76  |
|                                                |                                  | MCW0103 | 10    | 3.68     | 0.01 | 0.64  | 0.50  | 0.73  |
|                                                |                                  | MCW0016 | 35    | 8.73     | 0.05 | 0.87  | 0.81  | 0.89  |
|                                                |                                  | LEI0166 | 22    | 5.17     | 0.03 | 0.74  | 0.57  | 0.81  |
|                                                |                                  | MCW0037 | 10    | 3.55     | 0.01 | 0.65  | 0.54  | 0.72  |
|                                                |                                  | MCW0295 | 19    | 7.32     | 0.03 | 0.84  | 0.67  | 0.86  |
|                                                |                                  | MCW0098 | 11    | 1.68     | 0.02 | 0.31  | 0.28  | 0.41  |
|                                                |                                  | MCW0078 | 16    | 5.51     | 0.02 | 0.77  | 0.53  | 0.82  |
|                                                |                                  | MCW0081 | 27    | 4.40     | 0.04 | 0.73  | 0.61  | 0.77  |
|                                                |                                  | LEI0192 | 83    | 16.83    | 0.13 | 0.93  | 0.68  | 0.94  |
|                                                |                                  | MCW0014 | 26    | 6.55     | 0.04 | 0.79  | 0.40  | 0.85  |
|                                                |                                  | MCW0183 | 39    | 6.79     | 0.06 | 0.83  | 0.58  | 0.85  |
|                                                |                                  | ADL0278 | 26    | 7.70     | 0.04 | 0.00  | 0.64  | 0.87  |
|                                                |                                  | MCW0067 | 11    | 5.24     | 0.02 | 0.75  | 0.67  | 0.81  |
|                                                |                                  | ADL0112 | 18    | 5.58     | 0.03 | 0.77  | 0.57  | 0.82  |
|                                                |                                  | MCW0216 | 31    | 6.21     | 0.05 | 0.80  | 0.54  | 0.84  |
|                                                |                                  | MCW0104 | 47    | 10.08    | 0.08 | 0.88  | 0.66  | 0.90  |
|                                                |                                  | MCW0330 | 26    | 8.36     | 0.04 | 0.85  | 0.60  | 0.88  |
|                                                |                                  | MCW0165 | 17    | 3.82     | 0.03 | 0.69  | 0.61  | 0.74  |
|                                                |                                  | MCW0069 | 21    | 8.31     | 0.03 | 0.86  | 0.70  | 0.88  |

*Naemorhedus griseus* 11 microsatellite markers

|                                  |        |    |      |      |      |      |      |
|----------------------------------|--------|----|------|------|------|------|------|
| NGR <sub>10</sub><br>(6 markers) | SY434F | 8  | 1.64 | 0.10 | 0.37 | 0.08 | 0.39 |
|                                  | SY14F  | 11 | 2.51 | 0.14 | 0.57 | 0.22 | 0.60 |
|                                  | SY12BF | 13 | 5.28 | 0.16 | 0.79 | 0.35 | 0.81 |
|                                  | SY129F | 8  | 1.50 | 0.10 | 0.32 | 0.06 | 0.33 |
|                                  | SY449F | 5  | 1.48 | 0.06 | 0.31 | 0.05 | 0.32 |
|                                  | SY128F | 11 | 4.74 | 0.14 | 0.77 | 0.58 | 0.79 |
| NGR <sub>5</sub><br>(9 markers)  | SY434F | 8  | 1.64 | 0.10 | 0.37 | 0.08 | 0.39 |
|                                  | SY14F  | 11 | 2.51 | 0.14 | 0.57 | 0.22 | 0.60 |
|                                  | SY12BF | 13 | 5.28 | 0.16 | 0.79 | 0.35 | 0.81 |
|                                  | SY93F  | 13 | 2.84 | 0.16 | 0.62 | 0.38 | 0.65 |
|                                  | SY129F | 8  | 1.50 | 0.10 | 0.32 | 0.06 | 0.33 |
|                                  | SY76F  | 5  | 1.49 | 0.06 | 0.31 | 0.05 | 0.33 |
|                                  | SY449F | 5  | 1.48 | 0.06 | 0.31 | 0.05 | 0.32 |
|                                  | SY84BF | 10 | 1.65 | 0.13 | 0.38 | 0.19 | 0.39 |
|                                  | SY84F  | 5  | 2.06 | 0.06 | 0.47 | 0.06 | 0.51 |
| NGR <sub>1</sub><br>(11 markers) | SY434F | 8  | 1.64 | 0.10 | 0.37 | 0.08 | 0.39 |
|                                  | SY14F  | 11 | 2.51 | 0.14 | 0.57 | 0.22 | 0.60 |
|                                  | SY259F | 5  | 1.14 | 0.06 | 0.12 | 0.00 | 0.12 |
|                                  | SY12BF | 13 | 5.28 | 0.16 | 0.79 | 0.35 | 0.81 |
|                                  | SY93F  | 13 | 2.84 | 0.16 | 0.62 | 0.38 | 0.65 |
|                                  | SY129F | 8  | 1.50 | 0.10 | 0.32 | 0.06 | 0.33 |
|                                  | SY76F  | 5  | 1.49 | 0.06 | 0.31 | 0.05 | 0.33 |
|                                  | SY449F | 5  | 1.48 | 0.06 | 0.31 | 0.05 | 0.32 |
|                                  | SY128F | 11 | 4.74 | 0.14 | 0.77 | 0.58 | 0.79 |
|                                  | SY84BF | 10 | 1.65 | 0.13 | 0.38 | 0.19 | 0.39 |
|                                  | SY84F  | 5  | 2.06 | 0.06 | 0.47 | 0.06 | 0.51 |

**Table S3.** Statistical comparison between the most accurate selection method and the random microsatellite selection scheme.

| <i>Gallus gallus</i> 28 microsatellite markers dataset |                               |                 |                 | <i>Naemorhedus griseus</i> 11 microsatellite markers dataset |                               |                 |                 |
|--------------------------------------------------------|-------------------------------|-----------------|-----------------|--------------------------------------------------------------|-------------------------------|-----------------|-----------------|
| Quantity of microsatellite                             | Best selection method         | <i>p</i> -value | Mean difference | Quantity of microsatellite                                   | Best selection method         | <i>p</i> -value | Mean difference |
| 27                                                     | <i>PIC</i> + ACO <sup>1</sup> | < 0.001         | 0.002           | 10                                                           | ACO <sup>2</sup>              | < 0.001         | 0.039           |
| 26                                                     | <i>PIC</i> + ACO <sup>1</sup> | < 0.001         | 0.003           | 9                                                            | <i>PIC</i> + ACO <sup>1</sup> | < 0.001         | 0.029           |
| 25                                                     | <i>PIC</i> + ACO <sup>1</sup> | < 0.001         | 0.002           | 8                                                            | ACO <sup>2</sup>              | < 0.001         | 0.012           |
| 24                                                     | <i>PIC</i> + ACO <sup>1</sup> | < 0.001         | 0.002           | 7                                                            | <i>PIC</i> + ACO <sup>1</sup> | < 0.001         | 0.008           |
| 23                                                     | <i>PIC</i> + ACO <sup>1</sup> | < 0.001         | 0.003           | 6                                                            | Random <sup>4</sup>           | –               | 0.000           |
| 22                                                     | <i>PIC</i> + ACO <sup>1</sup> | < 0.001         | 0.003           | 5                                                            | Random <sup>4</sup>           | –               | 0.000           |
| 21                                                     | <i>PIC</i> + ACO <sup>1</sup> | < 0.001         | 0.004           | 4                                                            | <i>PIC</i> + ACO <sup>1</sup> | ns <sup>5</sup> | 0.005           |
| 20                                                     | <i>PIC</i> + ACO <sup>1</sup> | < 0.001         | 0.004           | 3                                                            | Random <sup>4</sup>           | –               | 0.000           |
| 19                                                     | <i>PIC</i> + ACO <sup>1</sup> | < 0.001         | 0.005           | 2                                                            | Random <sup>4</sup>           | –               | 0.000           |
| 18                                                     | <i>PIC</i> + ACO <sup>1</sup> | < 0.001         | 0.006           |                                                              |                               |                 |                 |
| 17                                                     | <i>PIC</i> + ACO <sup>1</sup> | < 0.001         | 0.005           |                                                              |                               |                 |                 |
| 16                                                     | <i>PIC</i> + ACO <sup>1</sup> | < 0.001         | 0.007           |                                                              |                               |                 |                 |
| 15                                                     | <i>PIC</i> + ACO <sup>1</sup> | < 0.001         | 0.007           |                                                              |                               |                 |                 |
| 14                                                     | <i>PIC</i> + ACO <sup>1</sup> | < 0.001         | 0.006           |                                                              |                               |                 |                 |
| 13                                                     | <i>PIC</i> + ACO <sup>1</sup> | < 0.001         | 0.009           |                                                              |                               |                 |                 |
| 12                                                     | <i>PIC</i> + ACO <sup>1</sup> | < 0.001         | 0.010           |                                                              |                               |                 |                 |
| 11                                                     | <i>PIC</i> + ACO <sup>1</sup> | < 0.001         | 0.013           |                                                              |                               |                 |                 |
| 10                                                     | <i>PIC</i> + ACO <sup>1</sup> | < 0.001         | 0.013           |                                                              |                               |                 |                 |
| 9                                                      | <i>PIC</i> + ACO <sup>1</sup> | < 0.001         | 0.014           |                                                              |                               |                 |                 |
| 8                                                      | <i>PIC</i> + ACO <sup>1</sup> | < 0.001         | 0.020           |                                                              |                               |                 |                 |
| 7                                                      | <i>PIC</i> + ACO <sup>1</sup> | < 0.001         | 0.035           |                                                              |                               |                 |                 |
| 6                                                      | <i>PIC</i> + ACO <sup>1</sup> | < 0.001         | 0.039           |                                                              |                               |                 |                 |
| 5                                                      | ACO <sup>2</sup>              | < 0.001         | 0.067           |                                                              |                               |                 |                 |
| 4                                                      | <i>PIC</i> <sup>3</sup>       | < 0.001         | 0.062           |                                                              |                               |                 |                 |
| 3                                                      | <i>PIC</i> + ACO <sup>1</sup> | < 0.001         | 0.127           |                                                              |                               |                 |                 |
| 2                                                      | <i>PIC</i> + ACO <sup>1</sup> | < 0.001         | 0.273           |                                                              |                               |                 |                 |

<sup>1</sup> *PIC* + ACO, selection scheme involving ranking the markers by their polymorphic information content and subsequently optimizing the set using *PIC* + ACO algorithm.

<sup>2</sup> ACO, selection scheme using only the ant colony optimization algorithm without any prior information on the *PIC* of the markers.

<sup>3</sup> *PIC*, selection scheme sorting microsatellites on their *PIC* and selecting the most informative loci.

<sup>4</sup> Random, selection scheme selecting randomly microsatellite markers.

<sup>5</sup> ns, not statistically significant ( $p > 0.05$ ).

**Table S4.** Number of population cluster estimated by the Structure software (Evanno et al., 2005).

| <i>Gallus gallus</i> 28 microsatellite markers dataset |                     | <i>Naemorhedus griseus</i> 11 microsatellite markers dataset |                     |
|--------------------------------------------------------|---------------------|--------------------------------------------------------------|---------------------|
| Number of loci                                         | Quantity of cluster | Number of loci                                               | Quantity of cluster |
| 28                                                     | 2                   | 11                                                           | 2                   |
| 27                                                     | 2                   | 10                                                           | 2                   |
| 26                                                     | 2                   | 9                                                            | 2                   |
| 25                                                     | 2                   | 8                                                            | 4                   |
| 24                                                     | 2                   | 7                                                            | 2                   |
| 23                                                     | 2                   | 6                                                            | 2                   |
| 22                                                     | 2                   | 5                                                            | 3                   |
| 21                                                     | 2                   | 4                                                            | 3                   |
| 20                                                     | 2                   | 3                                                            | 7                   |
| 19                                                     | 2                   | 2                                                            | 2                   |
| 18                                                     | 2                   |                                                              |                     |
| 17                                                     | 2                   |                                                              |                     |
| 16                                                     | 2                   |                                                              |                     |
| 15                                                     | 2                   |                                                              |                     |
| 14                                                     | 2                   |                                                              |                     |
| 13                                                     | 2                   |                                                              |                     |
| 12                                                     | 2                   |                                                              |                     |
| 11                                                     | 2                   |                                                              |                     |
| 10                                                     | 2                   |                                                              |                     |
| 9                                                      | 2                   |                                                              |                     |
| 8                                                      | 2                   |                                                              |                     |
| 7                                                      | 2                   |                                                              |                     |
| 6                                                      | 2                   |                                                              |                     |
| 5                                                      | 2                   |                                                              |                     |
| 4                                                      | 2                   |                                                              |                     |
| 3                                                      | 2                   |                                                              |                     |
| 2                                                      | 2                   |                                                              |                     |

## References

Evanno, G., Regnaut, S., & Goudet, J. (2005). Detecting the number of clusters of individuals using the software structure: a simulation study. *Molecular Ecology*, 14, 2611–2620. <https://doi.org/10.1111/j.1365-294x.2005.02553.x>

**Table S5.** Clustering of each subpopulations by using the Bayesian clustering of the Structure software (Evanno et al., 2005).

| K | N                         | Population clusters <sup>1</sup> ( <i>p</i> -value <sup>2</sup> )                                                                                                                                                                                                                                                                                                                                                                                                                                           |                                                                                                                                                  |
|---|---------------------------|-------------------------------------------------------------------------------------------------------------------------------------------------------------------------------------------------------------------------------------------------------------------------------------------------------------------------------------------------------------------------------------------------------------------------------------------------------------------------------------------------------------|--------------------------------------------------------------------------------------------------------------------------------------------------|
|   |                           | A                                                                                                                                                                                                                                                                                                                                                                                                                                                                                                           | B                                                                                                                                                |
| 2 | 28                        | SiSaKet (< 0.001), HuaiSai_Ggs (< 0.001), KP (< 0.001), DECOY (< 0.001), RoiEt (< 0.001), ChaingRai (< 0.001), DT (< 0.001), KhokMaiRua (< 0.001), HuaiYangPan (< 0.001), KhaoKho (< 0.001), Petchburi (< 0.001), PHD (< 0.001), Songkhla2 (< 0.001), HuaiSai_Gg (< 0.001), CH (< 0.001), Chaiyaphum (< 0.001), BLWF (< 0.001), FightChick (< 0.001), Songkhla1 (< 0.001), Sa_Kaeo (< 0.001), ChiangMaiZoo (< 0.001), BLBF (< 0.001), BT (< 0.001), Chabthaburi (< 0.001), LHK (< 0.001)                    | Lamphun (< 0.001), Chiang Rai (< 0.001), khonkan (< 0.001), MHS (< 0.001), Udonthani (< 0.001), Mae Hong Son (< 0.001), Nakhon Prathom (< 0.001) |
|   | 26<br>(GGA <sub>1</sub> ) | SiSaKet (< 0.001), HuaiSai_Ggs (< 0.001), KP (< 0.001), DECOY (< 0.001), RoiEt (< 0.001), ChaingRai (< 0.001), DT (< 0.001), KhokMaiRua (< 0.001), HuaiYangPan (< 0.001), KhaoKho (< 0.001), khonkan (< 0.001), Petchburi (< 0.001), PHD (< 0.001), Songkhla2 (< 0.001), HuaiSai_Gg (< 0.001), CH (< 0.001), Chaiyaphum (< 0.001), BLWF (< 0.001), FightChick (< 0.001), Songkhla1 (< 0.001), Sa_Kaeo (< 0.001), ChiangMaiZoo (< 0.001), BLBF (< 0.001), BT (< 0.001), Chabthaburi (< 0.001), LHK (< 0.001) | Lamphun (< 0.001), Chiang Rai (< 0.001), MHS (< 0.001), Udonthani (< 0.001), Mae Hong Son (< 0.001), Nakhon Prathom (< 0.001)                    |
|   | 12<br>(GGA <sub>5</sub> ) | SiSaKet (< 0.001), HuaiSai_Ggs (< 0.001), KP (< 0.001), DECOY (< 0.001), RoiEt (< 0.001), ChaingRai (< 0.001), DT (< 0.001), KhokMaiRua (< 0.001), HuaiYangPan (< 0.001), KhaoKho (< 0.001), Petchburi (< 0.001), PHD (< 0.001), Songkhla2 (< 0.001), HuaiSai_Gg (< 0.001), CH (< 0.001), Chaiyaphum (< 0.001), BLWF (< 0.001), FightChick (< 0.001), Songkhla1 (< 0.001), Sa_Kaeo (< 0.001), ChiangMaiZoo (< 0.001), BLBF (< 0.001), BT (< 0.001), Chabthaburi (< 0.001), LHK (< 0.001)                    | Lamphun (< 0.001), Chiang Rai (< 0.001), khonkan (< 0.001), MHS (< 0.001), Udonthani (< 0.001), Mae Hong Son (< 0.001), Nakhon Prathom (< 0.001) |
|   | 7<br>(GGA <sub>10</sub> ) | SiSaKet (< 0.001), HuaiSai_Ggs (< 0.001), KP (< 0.001), DECOY (< 0.001), RoiEt (< 0.001), ChaingRai (< 0.001), DT (< 0.001), KhokMaiRua (< 0.001), HuaiYangPan (< 0.001), KhaoKho (< 0.001), Petchburi (< 0.001), PHD (< 0.001), Songkhla2 (< 0.001), HuaiSai_Gg (< 0.001), CH (< 0.001), Chaiyaphum (< 0.001), BLWF (< 0.001), FightChick (< 0.001), Songkhla1 (< 0.001), Sa_Kaeo (< 0.001), ChiangMaiZoo (< 0.001), BLBF (< 0.001), BT (< 0.001), Chabthaburi (< 0.001), LHK (< 0.001)                    | Lamphun (< 0.001), Chiang Rai (< 0.001), khonkan (< 0.001), MHS (< 0.001), Udonthani (< 0.001), Mae Hong Son (< 0.001), Nakhon Prathom (< 0.001) |

|                                    | I                                                                                                                                                                                                                                                                                   | II                                                                                                                            | III                                                      | IV                                                                                                                     | V                                                         | VI                                                            | VII                                                        |
|------------------------------------|-------------------------------------------------------------------------------------------------------------------------------------------------------------------------------------------------------------------------------------------------------------------------------------|-------------------------------------------------------------------------------------------------------------------------------|----------------------------------------------------------|------------------------------------------------------------------------------------------------------------------------|-----------------------------------------------------------|---------------------------------------------------------------|------------------------------------------------------------|
| 28                                 | HuaiSai_Ggs (< 0.001), KP (< 0.001), DECOY (< 0.001), KhokMaiRua (< 0.001), KhaoKho (< 0.001), Petchburi (< 0.001), PHD (< 0.001), Songkhla2 (ns), HuaiSai_Gg (< 0.001), CH (< 0.001), FightChick (< 0.001), Songkhla1 (ns), LHK (< 0.001)                                          | Lamphun (< 0.001), Chiang Rai (< 0.001), Udonthani (< 0.001), Mae Hong Son (< 0.01), Nakhon Prathom (< 0.001)                 | DT (ns), BLWF (< 0.001), BLBF (< 0.001), BT (< 0.001)    | ChaingRai (< 0.001), khonkan (< 0.001), Chaiyaphum (< 0.001), ChiangMaiZoo (< 0.001)                                   | SiSaKet (< 0.001), RoiEt (< 0.001), HuaiYangPan (< 0.001) | Sa_Kao (< 0.001), Chabthaburi (< 0.001)                       | MHS (< 0.001)                                              |
| 26<br>(GGA <sub>1</sub> )          | HuaiSai_Ggs (< 0.001), KP (< 0.001), DECOY (< 0.001), KhokMaiRua (< 0.001), KhaoKho (< 0.001), Petchburi (< 0.001), PHD (< 0.001), Songkhla2 (ns), HuaiSai_Gg (< 0.001), CH (< 0.001), FightChick (< 0.001), Songkhla1 (< 0.001), ChiangMaiZoo (ns), LHK (< 0.001)                  | Lamphun (< 0.001), Chiang Rai (< 0.001), Udonthani (< 0.001), Mae Hong Son (< 0.001), Nakhon Prathom (< 0.001)                | DT (< 0.5), BLWF (< 0.001), BLBF (< 0.001), BT (< 0.001) | ChaingRai (ns), khonkan (< 0.001)                                                                                      | SiSaKet (< 0.001), RoiEt (< 0.001), HuaiYangPan (< 0.001) | Chaiyaphum (< 0.001), Sa_Kao (< 0.001), Chabthaburi (< 0.001) | MHS (< 0.001)                                              |
| 7<br><br>12<br>(GGA <sub>5</sub> ) | HuaiSai_Ggs (< 0.001), KP (< 0.001), DECOY (< 0.001), DT (< 0.001), KhokMaiRua (< 0.001), HuaiYangPan (< 0.001), Petchburi (< 0.01), PHD (< 0.001), Songkhla2 (ns), HuaiSai_Gg (< 0.001), CH (< 0.001), FightChick (< 0.001), Songkhla1 (< 0.001), ChiangMaiZoo (ns), LHK (< 0.001) | Lamphun (< 0.001), MHS (< 0.001), Udonthani (< 0.001), Mae Hong Son (< 0.001), Nakhon Prathom (< 0.001)                       | BLWF (< 0.001), BLBF (< 0.001), BT (< 0.001)             | Chiang Rai (< 0.001), khonkan (< 0.001)                                                                                | SiSaKet (< 0.001), RoiEt (< 0.001), KhaoKho (< 0.001)     | Sa_Kao (< 0.001), Chabthaburi (< 0.001)                       | ChaingRai (< 0.001), Chaiyaphum (< 0.001)                  |
| 7<br>(GGA <sub>10</sub> )          | KP (< 0.001), DECOY (< 0.001), HuaiYangPan (< 0.001), Songkhla2 (ns), CH (< 0.01), FightChick (< 0.001), Songkhla1 (ns), ChiangMaiZoo (ns), LHK (< 0.001)                                                                                                                           | Lamphun (< 0.001), Chiang Rai (< 0.001), MHS (< 0.001), Udonthani (< 0.001), Mae Hong Son (< 0.001), Nakhon Prathom (< 0.001) | HuaiSai_Gg (ns), BT (< 0.001)                            | HuaiSai_Ggs (< 0.001), DT (< 0.001), KhokMaiRua (< 0.5), Petchburi (< 0.001), PHD (ns), BLWF (< 0.001), BLBF (< 0.001) | SiSaKet (< 0.001), RoiEt (< 0.001), KhaoKho (< 0.001)     | Sa_Kao (< 0.001), Chabthaburi (< 0.001)                       | ChaingRai (< 0.5), khonkan (< 0.001), Chaiyaphum (< 0.001) |

|                                    | a                                                                                                                                                                                                                         | b                                                                                                                                   | c                                                                                                                | d                                                            | e                                                  | f                                                                                              | g                                                                                                       | h                                                                                                      | i                                                                                                                          |
|------------------------------------|---------------------------------------------------------------------------------------------------------------------------------------------------------------------------------------------------------------------------|-------------------------------------------------------------------------------------------------------------------------------------|------------------------------------------------------------------------------------------------------------------|--------------------------------------------------------------|----------------------------------------------------|------------------------------------------------------------------------------------------------|---------------------------------------------------------------------------------------------------------|--------------------------------------------------------------------------------------------------------|----------------------------------------------------------------------------------------------------------------------------|
| 28                                 | KP (< 0.001),<br>DECOY (< 0.001),<br>ChaingRai (< 0.001), PHD (< 0.001), Songkhla2 (< 0.001),<br>HuaiSai_Gg (ns),<br>CH (< 0.001),<br>FightChick (< 0.001), Songkhla1 (< 0.001),<br>ChiangMaiZoo (< 0.001), LHK (< 0.001) | Lamphun (< 0.001),<br>Chiang Rai (< 0.001), MHS (< 0.001), Udonthani (< 0.001), Mae Hong Son (< 0.001),<br>Nakhon Prathom (< 0.001) | HuaiSai_Ggs (< 0.5), KhokMaiRua (< 0.001), KhaoKho (< 0.01), Petchburi (< 0.001), Mae (< 0.001)                  | DT (< 0.01),<br>BLWF (< 0.001), BLBF (< 0.001), BT (< 0.001) | Sa_Kaeo (< 0.001),<br>Chabthaburi (< 0.001)        | SiSaKet (< 0.001),<br>RoiEt (< 0.001)                                                          | HuaiYangPan (< 0.001)                                                                                   | Chaiyaphum (< 0.001)                                                                                   | khonkan (< 0.001)                                                                                                          |
| 26<br>(GGA <sub>1</sub> )          | KP (< 0.001),<br>DECOY (< 0.001),<br>PHD (< 0.001), CH (< 0.001),<br>FightChick (< 0.001), LHK (< 0.001)                                                                                                                  | ChaingRai (< 0.001), khonkan (< 0.001), Songkhla2 (ns), Chaiyaphum (< 0.001), Songkhla1 (ns), ChiangMaiZoo (< 0.01)                 | HuaiSai_Ggs (< 0.001),<br>KhokMaiRua (< 0.5), HuaiYangPan (< 0.001), Petchburi (< 0.001),<br>HuaiSai_Gg (< 0.01) | DT (< 0.01),<br>BLWF (< 0.001), BLBF (< 0.001), BT (< 0.001) | Sa_Kaeo (< 0.001),<br>Chabthaburi (< 0.001)        | SiSaKet (< 0.001),<br>RoiEt (< 0.001)                                                          | Lamphun (< 0.001), MHS (< 0.001), Udonthani (< 0.001), Mae Hong Son (< 0.001), Nakhon Prathom (< 0.001) | Chiang Rai (< 0.001)                                                                                   | KhaoKho (< 0.001)                                                                                                          |
| 9<br><br>12<br>(GGA <sub>5</sub> ) | Lamphun (< 0.001),<br>Udonthani (< 0.001), Mae Hong Son (< 0.001),<br>Nakhon Prathom (< 0.001)                                                                                                                            | MHS (< 0.001)                                                                                                                       | SiSaKet (< 0.001),<br>RoiEt (< 0.001),<br>Chaiyaphum (< 0.001)                                                   | Chiang Rai (< 0.001),<br>khonkan (< 0.001)                   | BLWF (< 0.001),<br>BLBF (< 0.001),<br>BT (< 0.001) | ChaingRai (< 0.001),<br>Songkhla1 (< 0.5),<br>ChiangMaiZoo (< 0.001),<br>Chabthaburi (< 0.001) | KhokMaiRua (< 0.001), KhaoKho (< 0.001),<br>Songkhla2 (ns)                                              | HuaiSai_Ggs (< 0.001), DT (< 0.01),<br>HuaiYangPan (< 0.001),<br>Petchburi (ns),<br>HuaiSai_Gg (< 0.5) | KP (< 0.001),<br>DECOY (< 0.01), PHD (< 0.001), CH (< 0.001),<br>FightChick (< 0.001),<br>Sa_Kaeo (< 0.001), LHK (< 0.001) |
| 7<br>(GGA <sub>10</sub> )          | KP (< 0.001),<br>DECOY (< 0.001),<br>KhokMaiRua (< 0.001), Petchburi (< 0.01), PHD (< 0.001), Songkhla2 (ns), CH (< 0.001),<br>FightChick (< 0.001), Songkhla1 (< 0.001),<br>ChiangMaiZoo (< 0.5), LHK (< 0.001)          | HuaiSai_Ggs (< 0.001), DT (< 0.001), HuaiSai_Gg (< 0.01), BLWF (< 0.001), BLBF (< 0.001), BT (< 0.001)                              | Lamphun (< 0.001),<br>MHS (< 0.001),<br>Udonthani (< 0.001), Mae Hong Son (< 0.001),<br>Nakhon Prathom (< 0.001) | SiSaKet (< 0.001),<br>RoiEt (< 0.001)                        | Chabthaburi (< 0.001)                              | Chiang Rai (< 0.001),<br>khonkan (< 0.001)                                                     | HuaiYangPan (< 0.001)                                                                                   | ChaingRai (ns), KhaoKho (< 0.001),<br>Chaiyaphum (< 0.001)                                             | Sa_Kaeo (< 0.001)                                                                                                          |

<sup>1</sup> According to the value of  $K$  chosen for the Bayesian clustering algorithm, population clusters are named A, and B for  $K=2$  ; I, II, III, IV, V, VI, and VII for  $K=7$  ; and a, b, c, d, e, f, g, h, and i for  $K=9$ .

<sup>2</sup> The  $p$ -value was measured by independent  $t$ -test on the posterior probability.



## References

Evanno, G., Regnaut, S., & Goudet, J. (2005). Detecting the number of clusters of individuals using the software structure: a simulation study. *Molecular Ecology*, 14, 2611–2620. <https://doi.org/10.1111/j.1365-294x.2005.02553.x>
