# Supplementary figures and images for: Optimizing Microsatellite Marker Panels for Genetic Diversity and Population Genetic Studies: An Ant Colony Algorithm Approach with Polymorphic Information Content
Source: MDPI journal article supplement (doi:10.3390/biology12101280), 2023-09-25

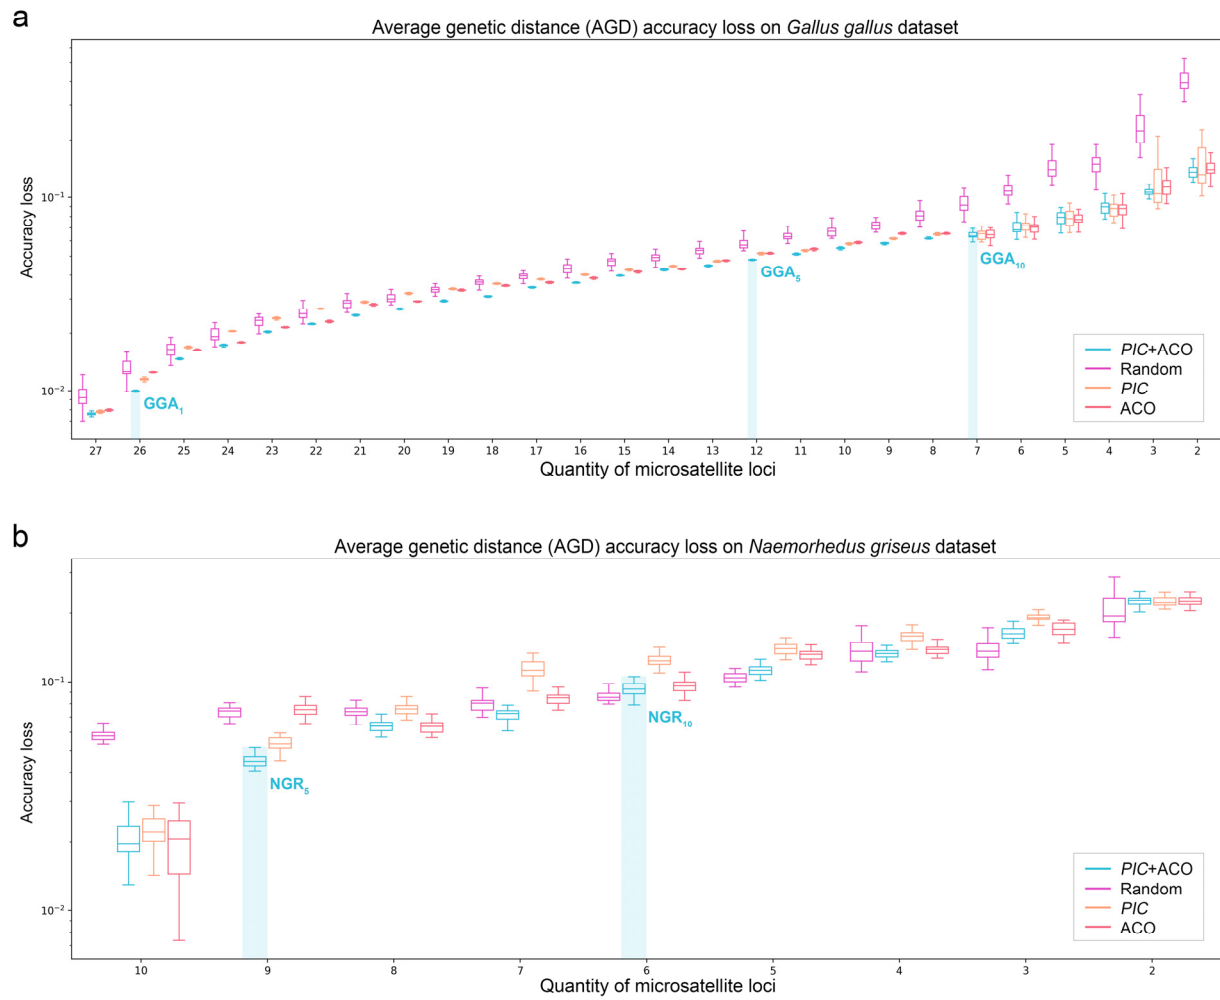

**Figure S1.** (Rasoarahona et al.)



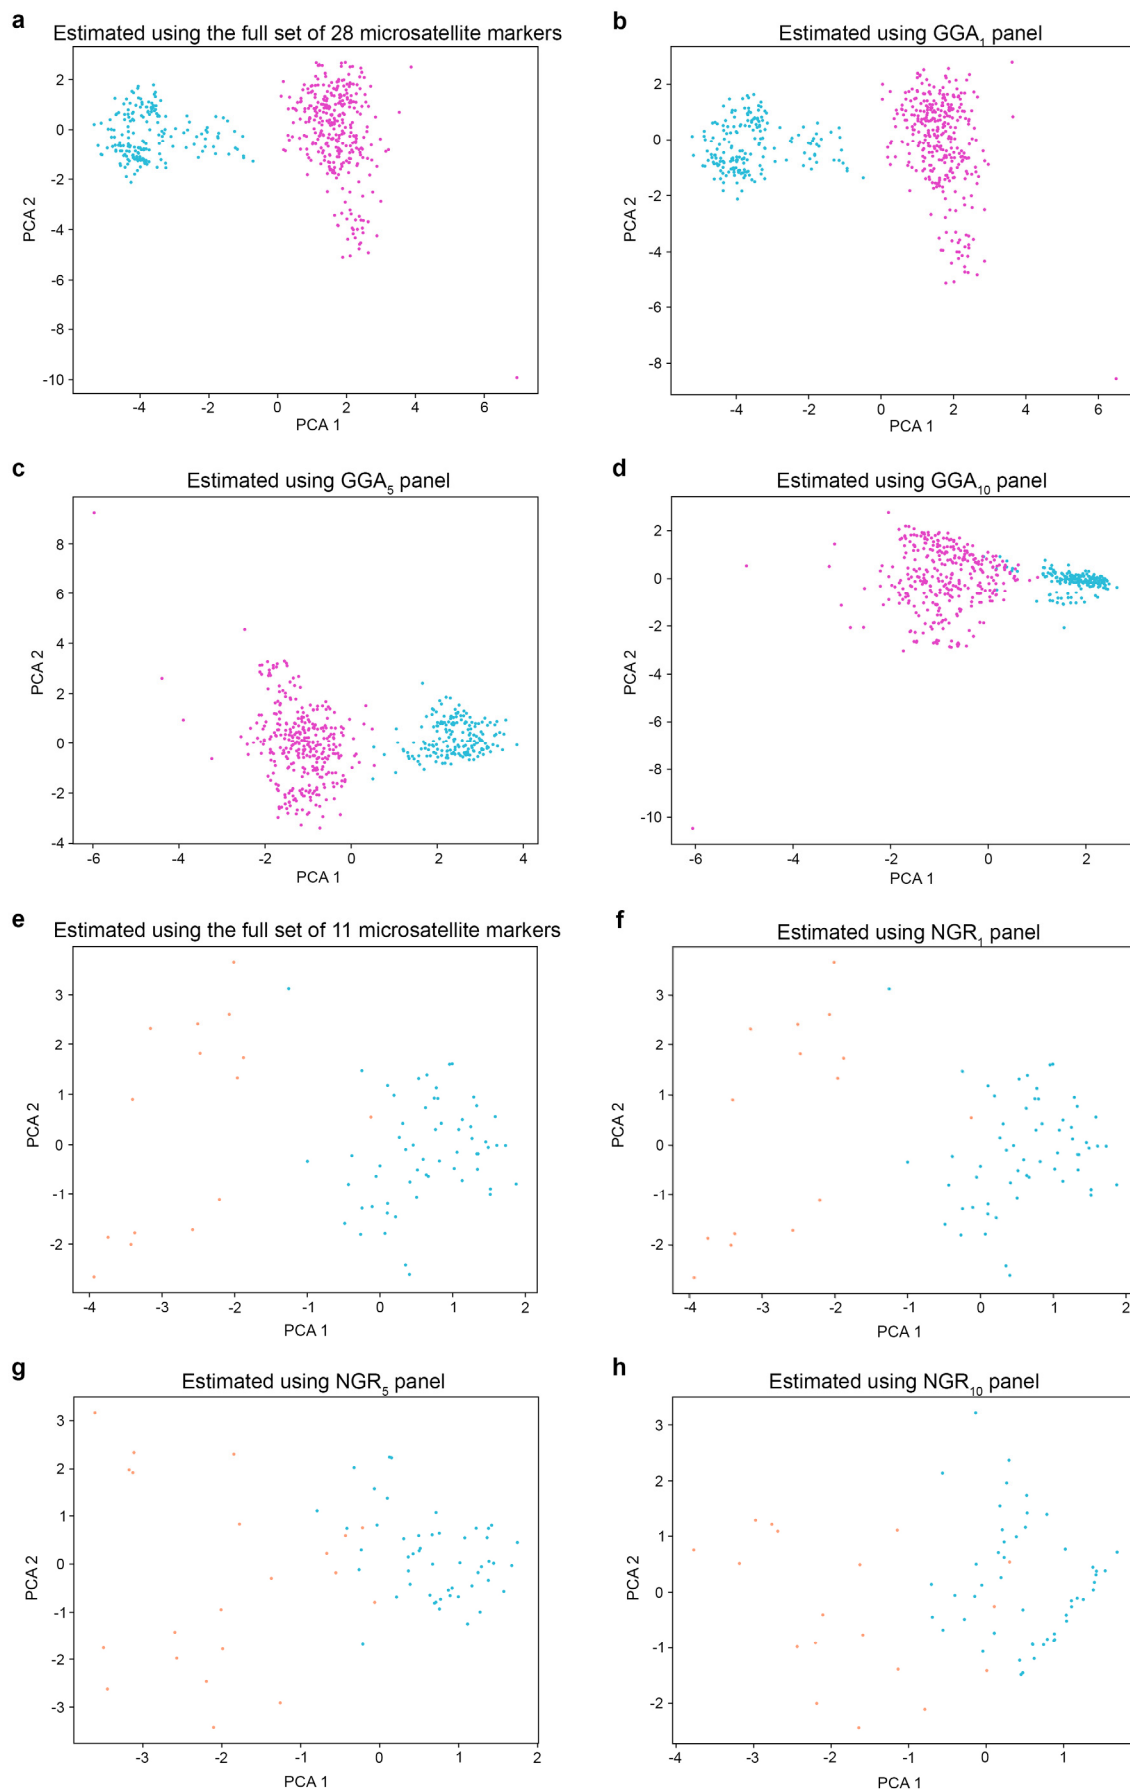

**Figure S3.** (Rasoarahona et al.)

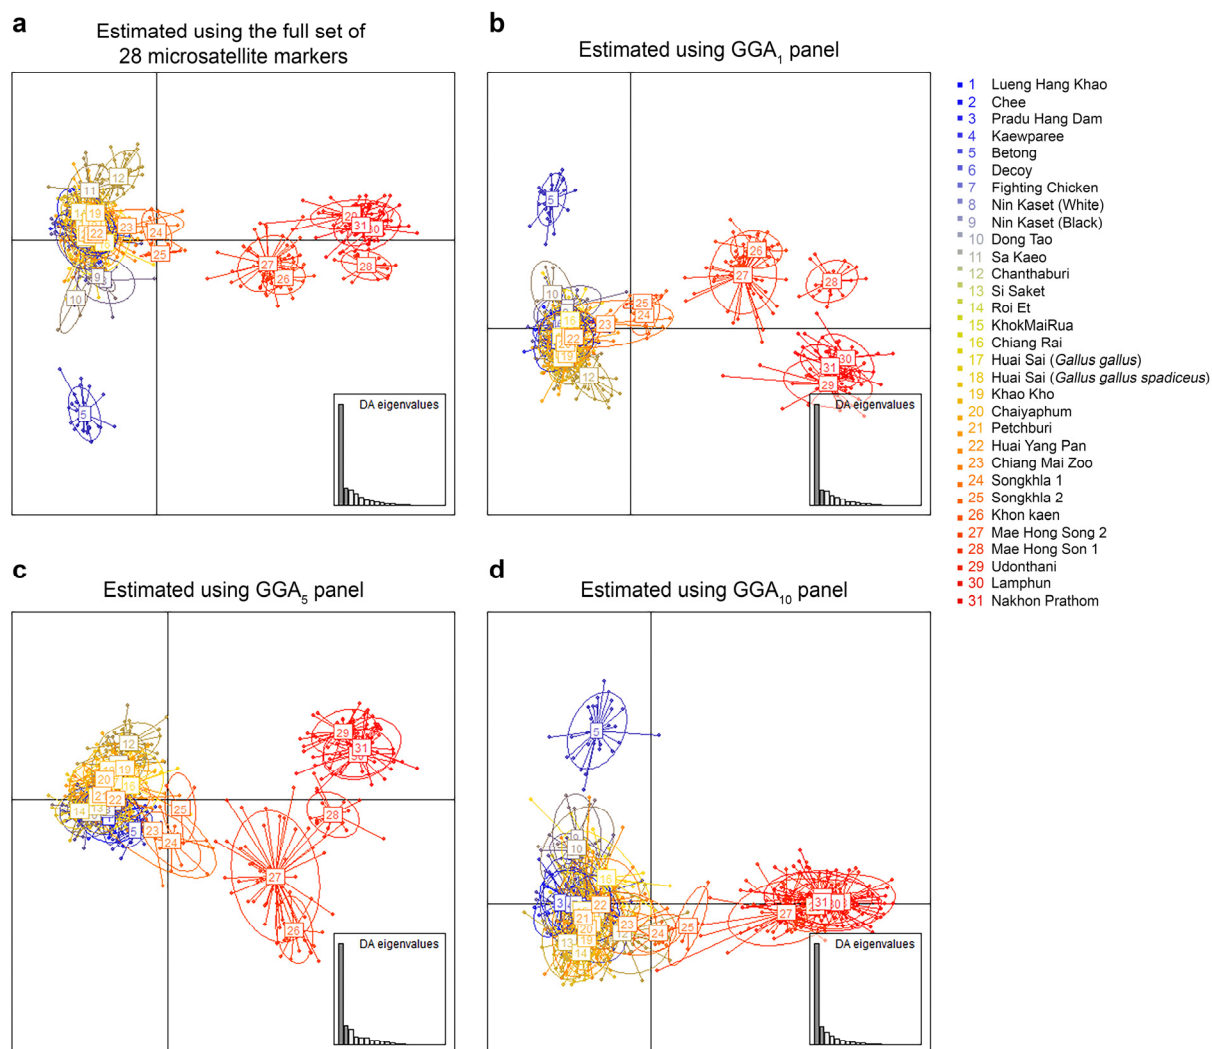

**Figure S4.** (Rasoarahona et al.)

Supplement: s1 [file s1]
